# Supplementary material
Source: Springer Nature journal article supplement (https://www.springermedizin.de/resource/supplementary/13075_2012_3679_MOESM2_ESM.pdf/9695082)

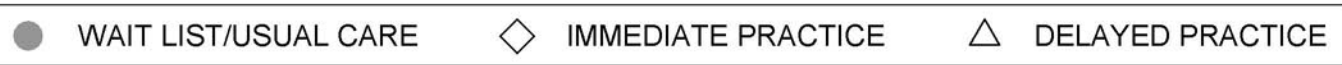

**A. NRS-PI**

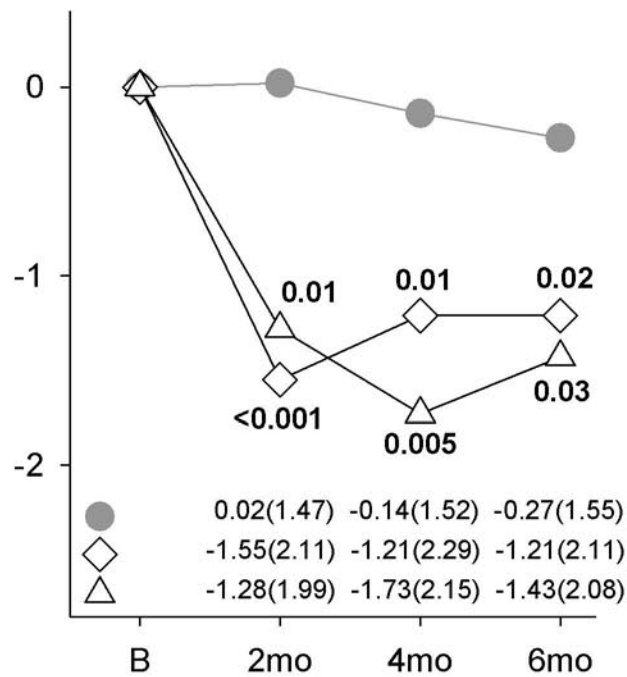

**B. FIQ**

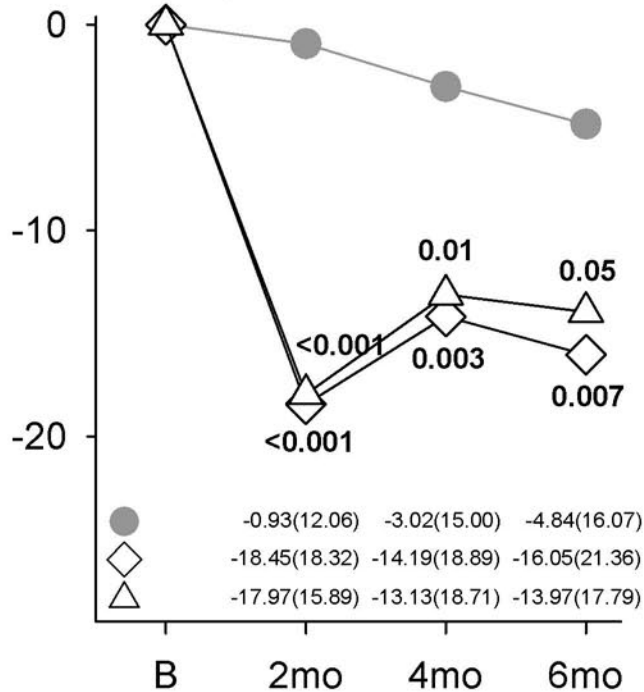

**C. PSQI**

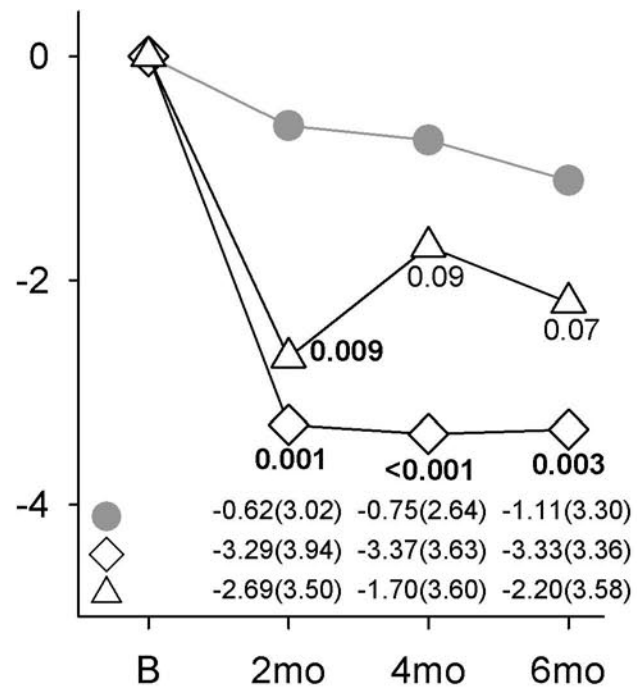

Supplement: MOESM2 [file 9695082]
